# Supplementary material for: Histone gene expression and histone mRNA 3' end structure in Caenorhabditis elegans
Source: PubMed Central journal article supplement (PMC1924863; doi:10.1186/1471-2199-8-51), 2007-06-14

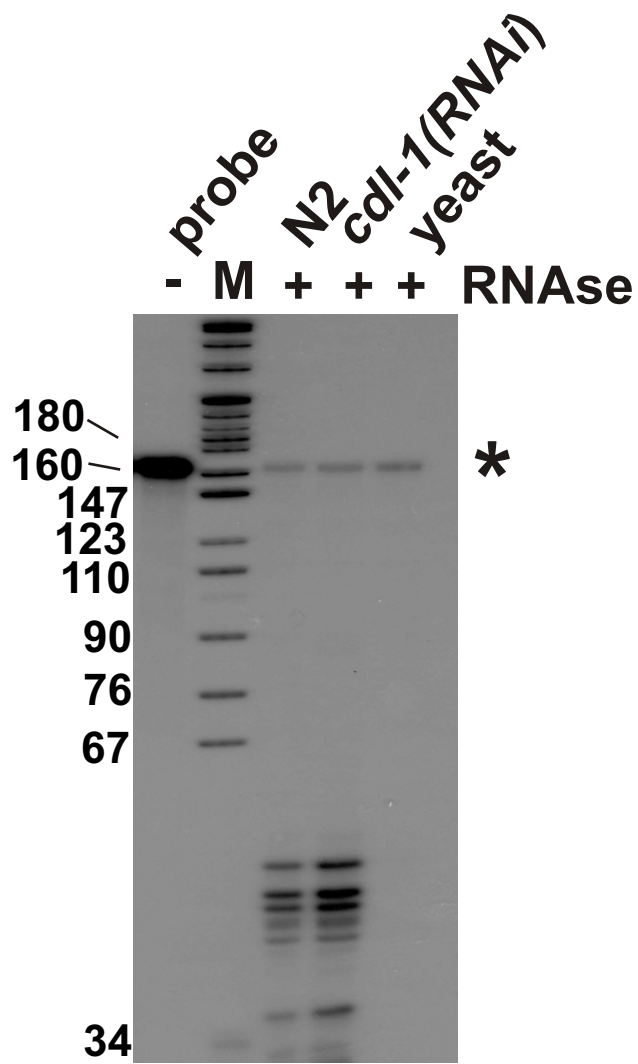

Supplement: 1471-2199-8-51-S2.pdf [file 1471-2199-8-51-S2.pdf]
